# Supplementary material
Source: PubMed Central journal article supplement (PMC6625887)

**LFP power, 30-150 Hz**

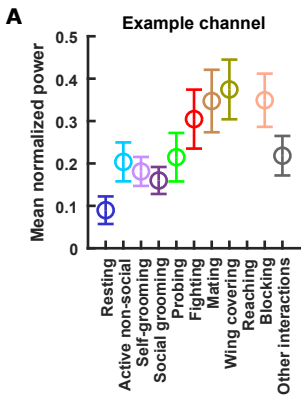

**LFP power, 1-29 Hz**

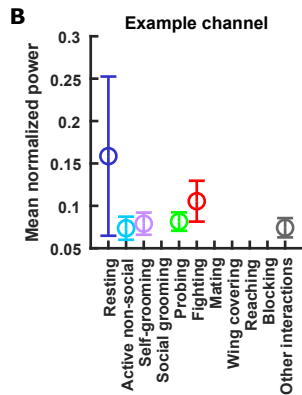

**Multiunits**

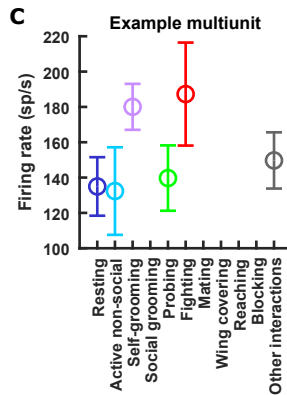

**Single units**

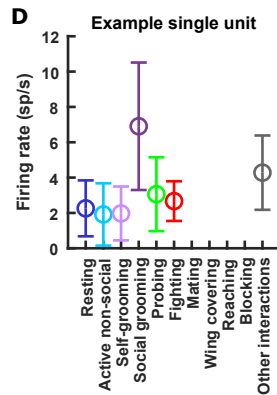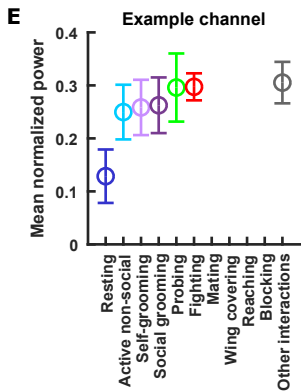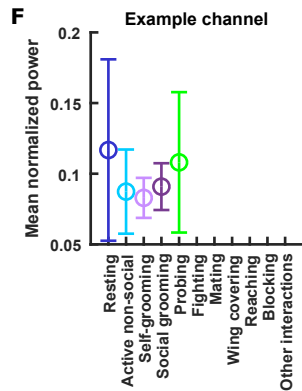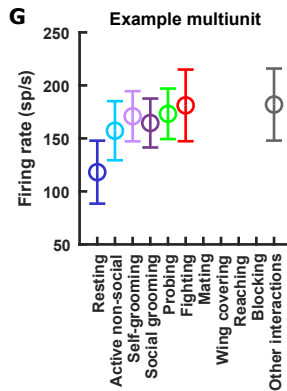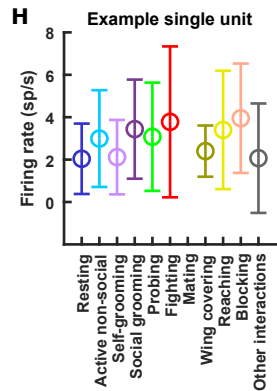

**Element at row *a* and column *b*:**

**fraction of channels or units showing significantly higher activity during the behavior of row *a* than the behavior of column *b***

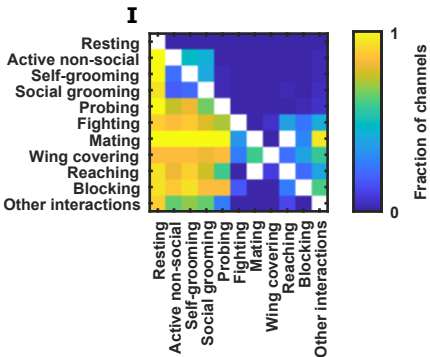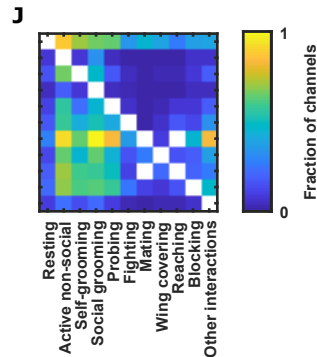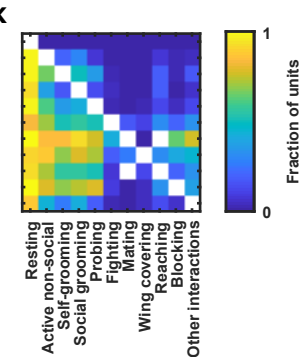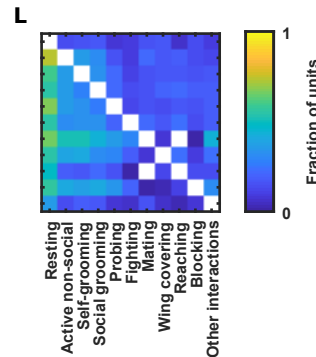

**Element at row *a* and column *b*:**

**accuracy of binary classification of the behaviors of row *a* and column *b* using neural activity**

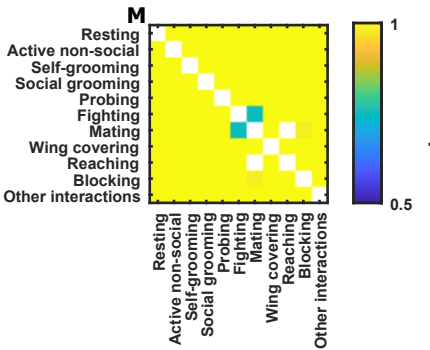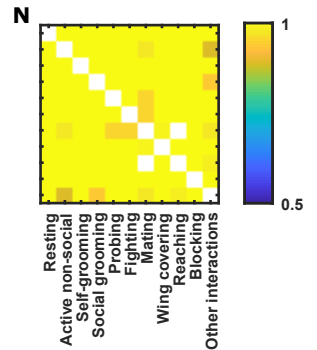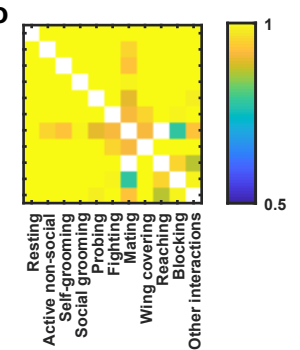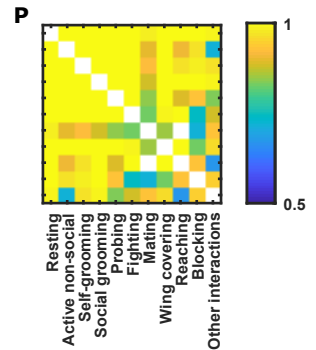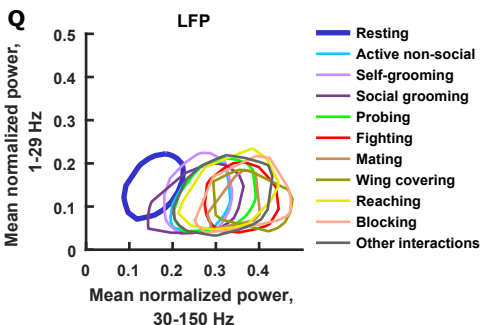

Supplement: NIHMS1529354-supplement-SF2.pdf [file NIHMS1529354-supplement-SF2.pdf]
