# Supplementary material
Source: PubMed Central journal article supplement (PMC6625887)

- Resting
- Active non-social
- Self-grooming
- Social grooming
- Probing

LFP, 30-150 Hz, power phase difference across bats

LFP, 1-29 Hz, power phase difference across bats

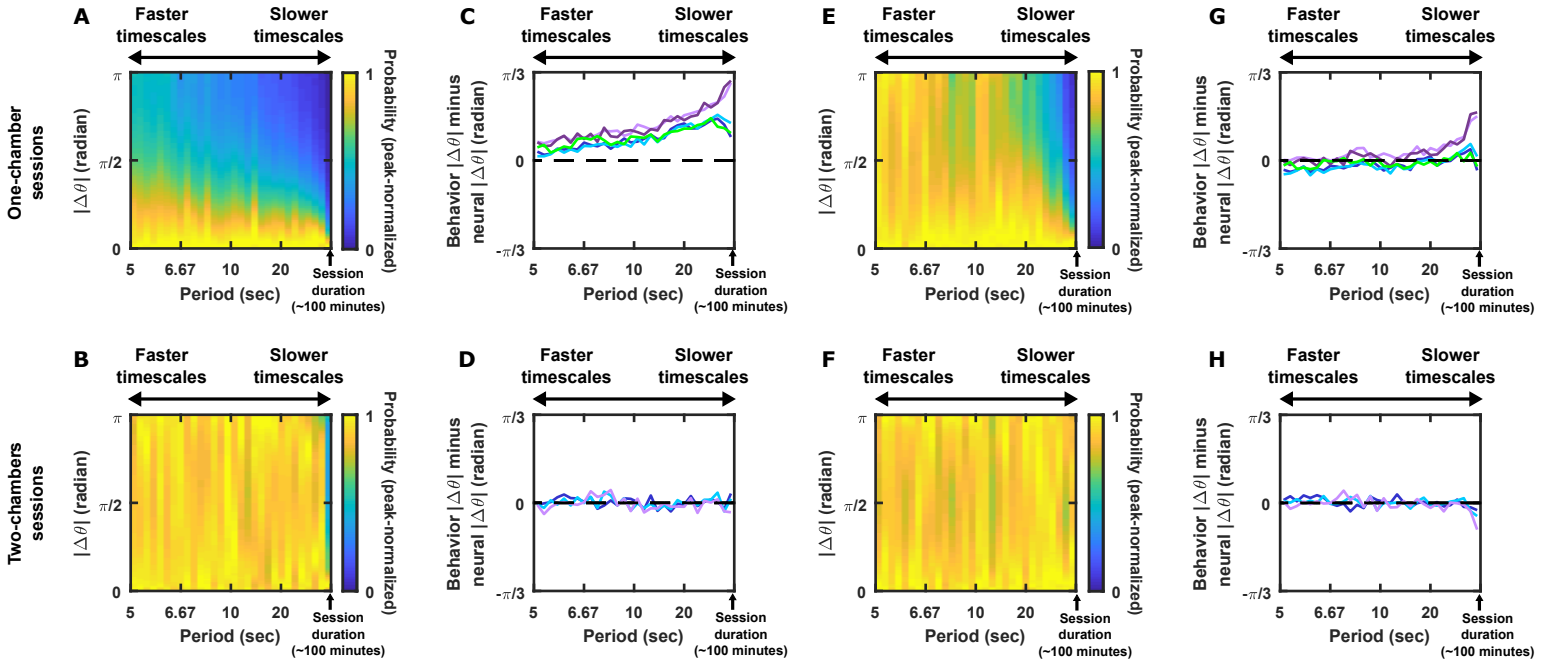

Multiunits, firing rate phase difference across bats

Single units, firing rate phase difference across bats

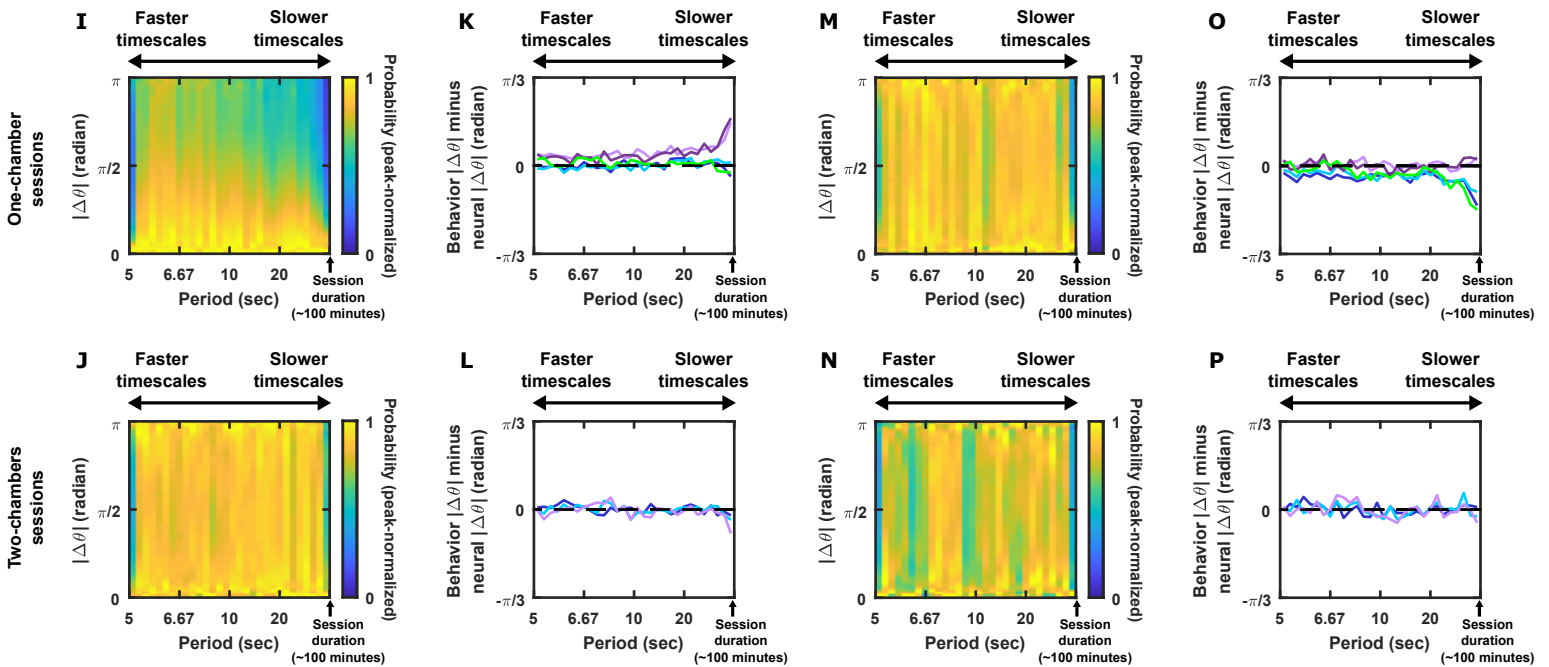

Supplement: NIHMS1529354-supplement-SF6.pdf [file NIHMS1529354-supplement-SF6.pdf]
