# Supplementary material
Source: PubMed Central journal article supplement (PMC6625887)

**A** Behavior-matched time periods from one-chamber and two-chambers sessions

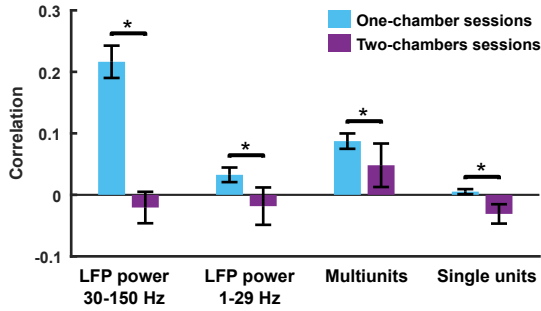

**B** Behavioral-sequence-matched time periods from one-chamber and two-chambers sessions

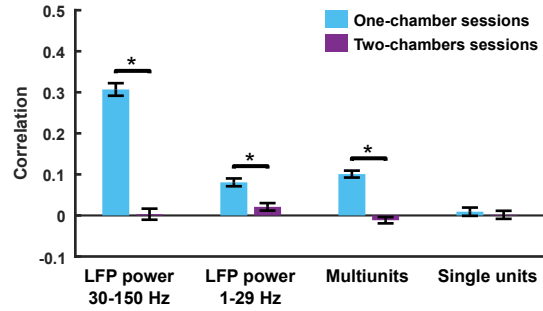

**C** One neural bat interacting with a non-neural bat, the other neural bat not interacting

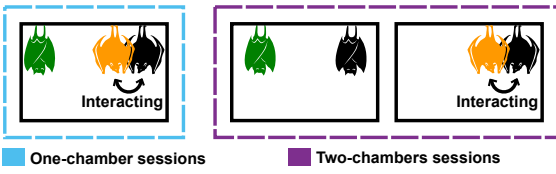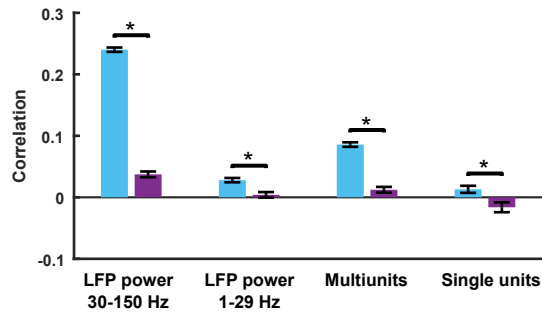

**D** LFP power, 30-150 Hz

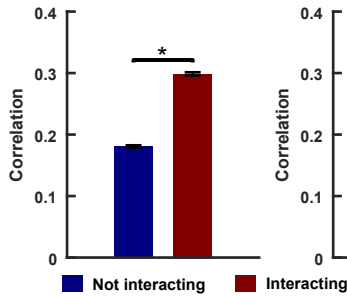

**E** Multiunits

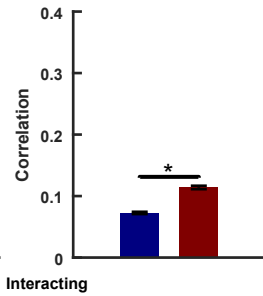

**F** LFP power, 30-150 Hz

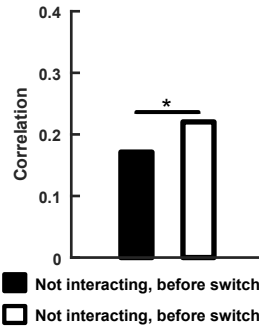

**G** Multiunits

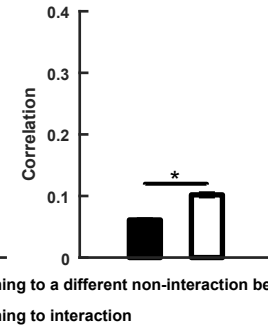

**H** LFP power, 30-150 Hz

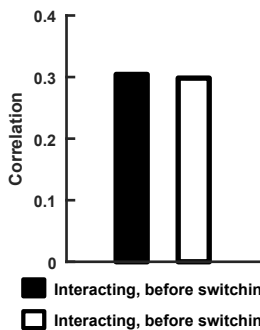

**I** Multiunits

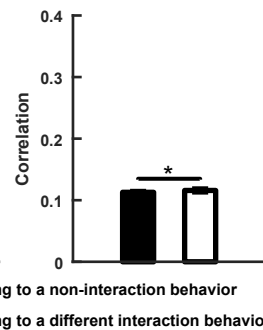

**J** LFP power, 30-150 Hz

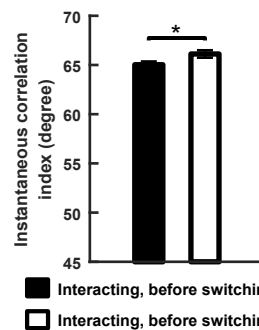

**K** Multiunits

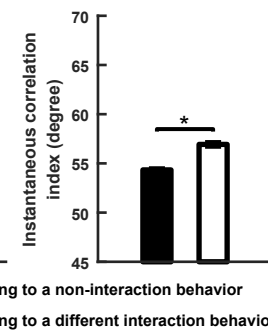

Supplement: NIHMS1529354-supplement-SF7.pdf [file NIHMS1529354-supplement-SF7.pdf]
