# Supplementary material
Source: PubMed Central journal article supplement (PMC6625887)

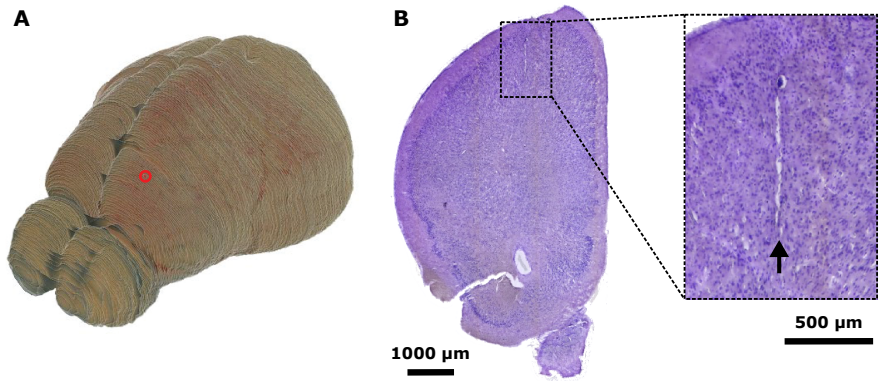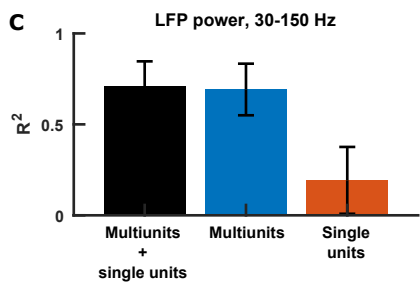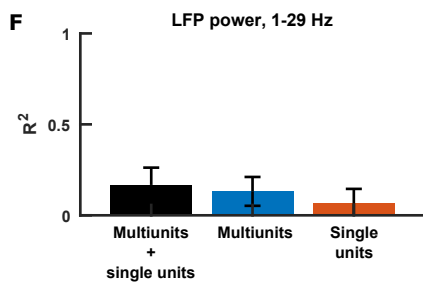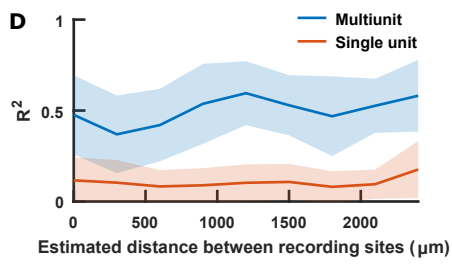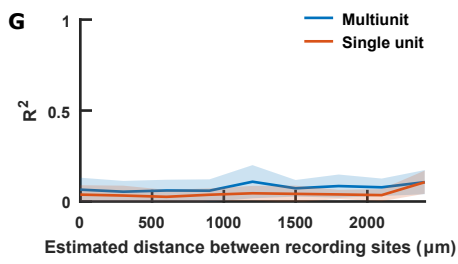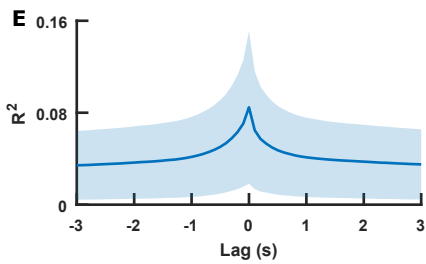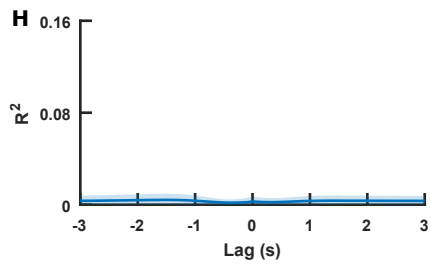

Supplement: NIHMS1529354-supplement-SF1.pdf [file NIHMS1529354-supplement-SF1.pdf]

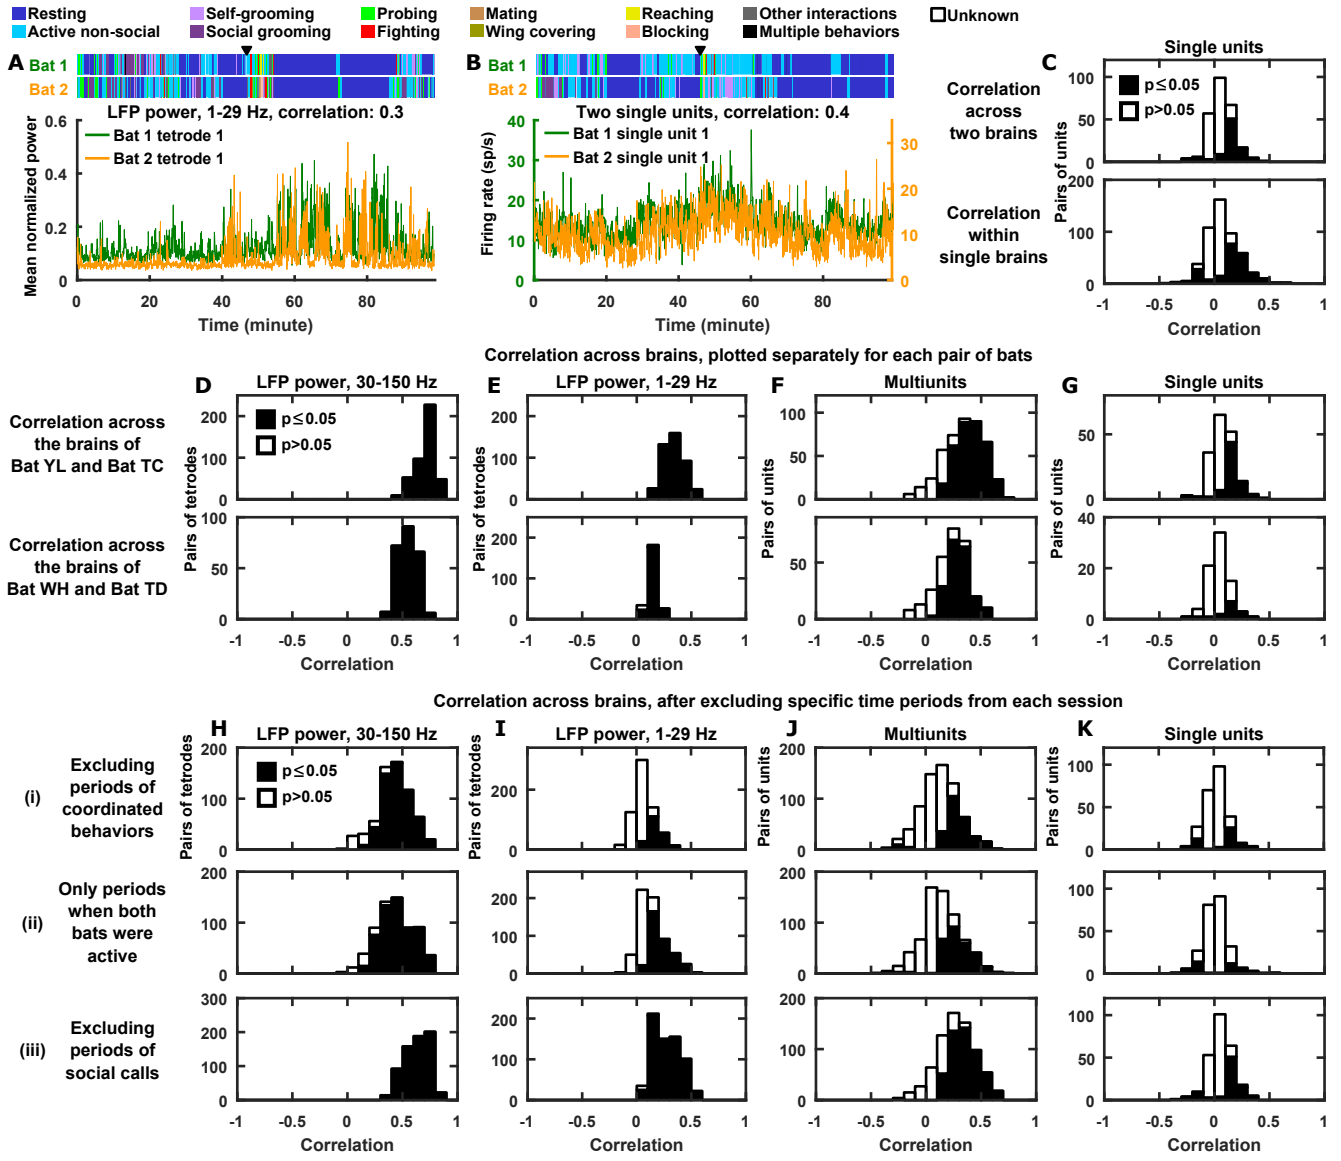

Supplement: NIHMS1529354-supplement-SF3.pdf [file NIHMS1529354-supplement-SF3.pdf]

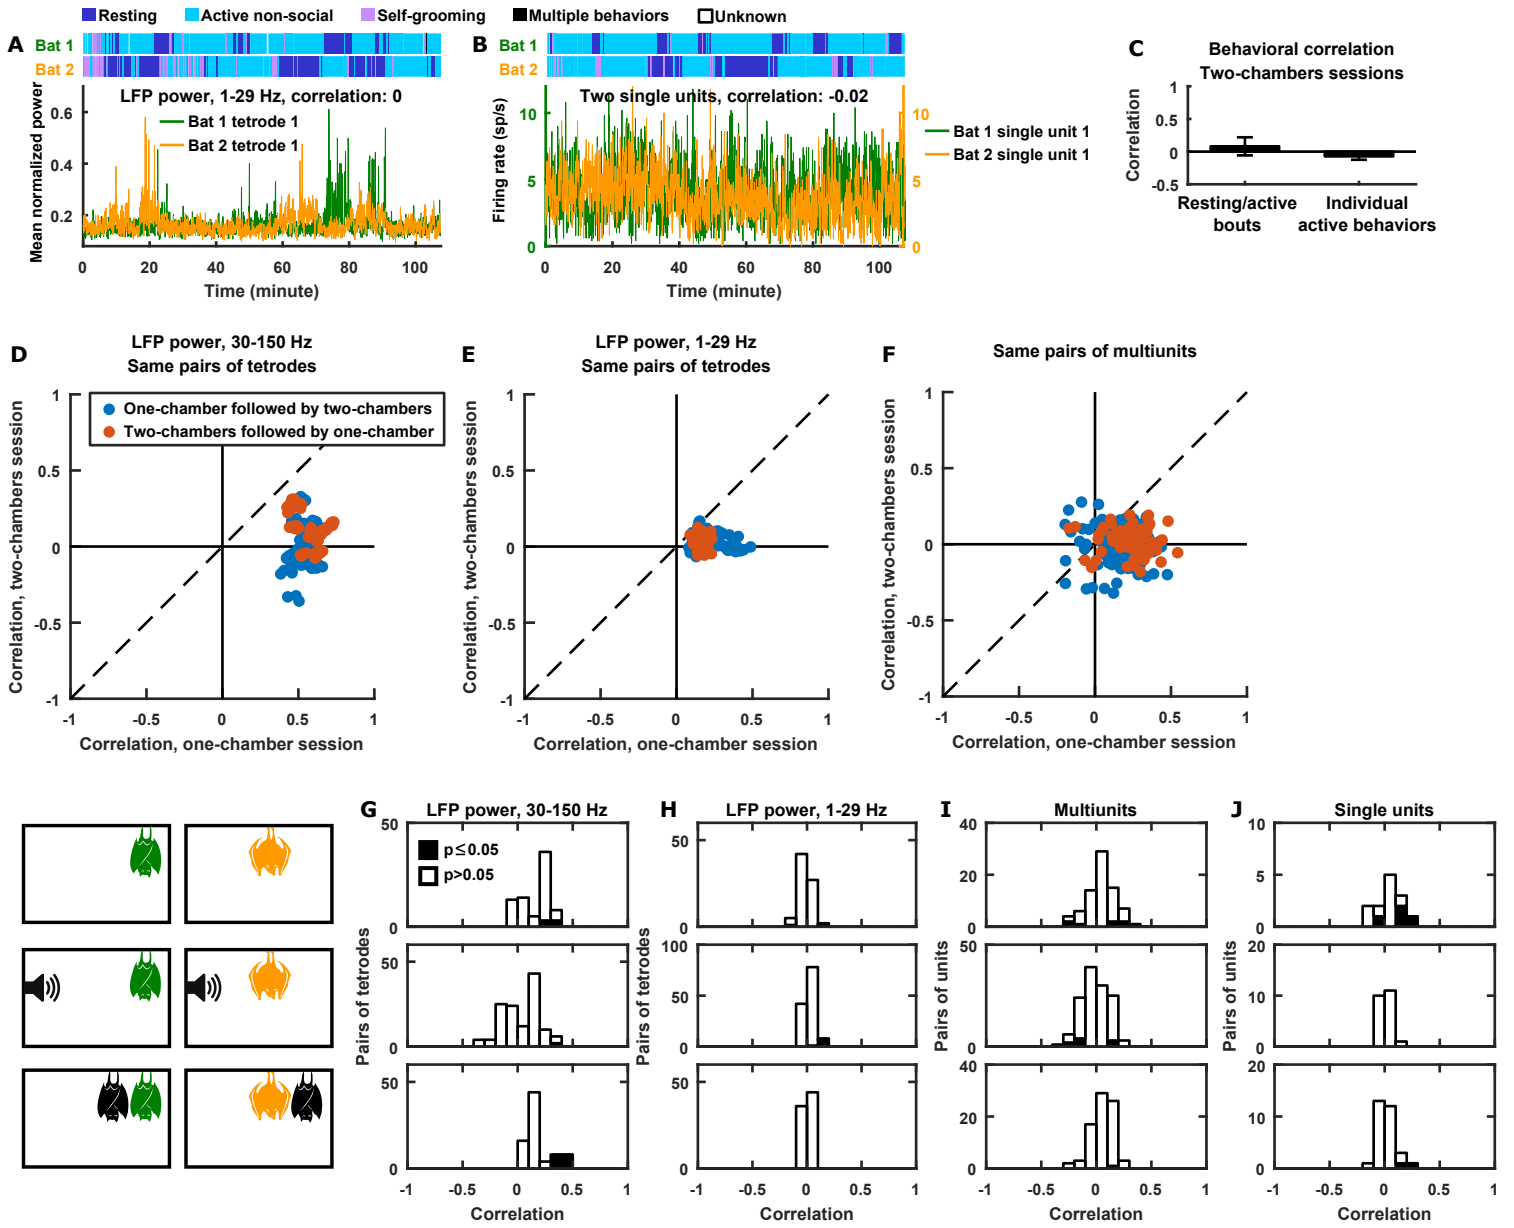

Supplement: NIHMS1529354-supplement-SF4.pdf [file NIHMS1529354-supplement-SF4.pdf]

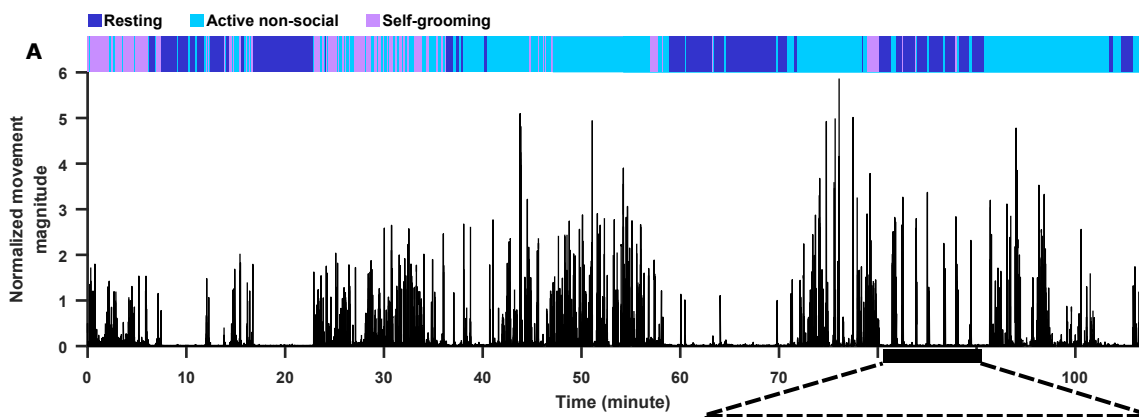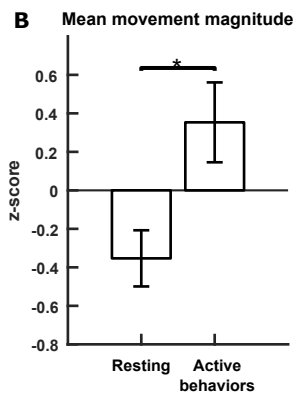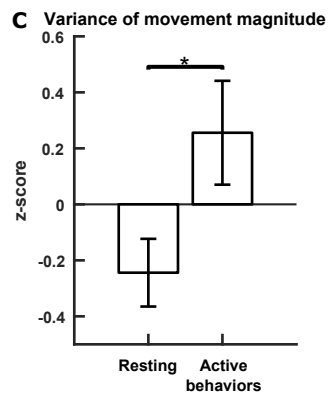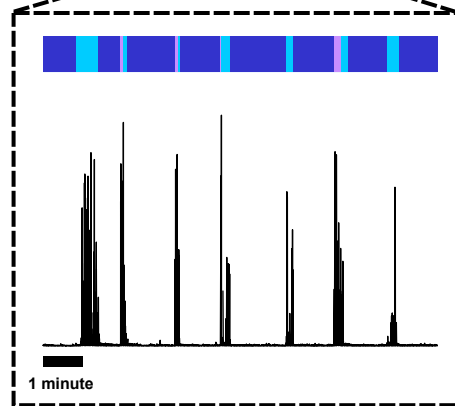

Supplement: NIHMS1529354-supplement-SF5.pdf [file NIHMS1529354-supplement-SF5.pdf]
